# Supplementary material for: Multicenter Evaluation of the QIAstat-Dx Respiratory Panel for Detection of Viruses and Bacteria in Nasopharyngeal Swab Specimens
Source: PubMed Central journal article supplement (PMC7180242; doi:10.1128/jcm.00155-20), 2020-04-23
Supplement: JCM.00155-20-s0001.pdf [file JCM.00155-20-s0001.pdf]

**Supplemental Data:**

TABLE S1 Median Cycle Threshold (Ct) values for the True Positive (TP) and False Positive (FP) Detections with the QIAstat-Dx Respiratory Panel – Data compiled from results before discrepant analysis.

| Analyte                      | TP <sup>a</sup>                 | FP                      | Pvalue <sup>c</sup> |
|------------------------------|---------------------------------|-------------------------|---------------------|
|                              | Median Ct (IQR, n) <sup>b</sup> | Median Ct (IQR, n)      |                     |
| Adenovirus                   | 29.0 (22.2-32.8, n=92)          | 34.1 (33.4-35.6, n= 23) | <b>0.001</b>        |
| Coronavirus 229E             | 28.9 (25.0-30.8, n=34)          | -                       | NA                  |
| Coronavirus HKU1             | 27.5 (22.0-30.6, n=65)          | 34.0 (32.0-36.0, n=8)   | <b>0.002</b>        |
| Coronavirus NL63             | 29.7 (24.6-32.2, n=64)          | 34.9 (33.2-35.4, n=4)   | <b>0.039</b>        |
| Coronavirus OC43             | 25.1 (20.9-29.7, n=54)          | 34.1 (31.6-34.3, n=4)   | <b>0.038</b>        |
| Human Metapneumovirus        | 25.9 (20.8-29.8,n=116)          | 34.6 (32.6-35.1, n=5)   | <b>0.017</b>        |
| Rhinovirus/Enterovirus       | 28.4 (24.5-30.7, n=312)         | 32.4 (30.6-34.2,n=46)   | <b>&lt;0.0001</b>   |
| Influenza A                  | 27.3 (22.9-30.9, n=259)         | 34.7 (34.2-36.4, n=9)   | <b>0.016</b>        |
| Influenza A H1               | -                               | -                       | NA                  |
| Influenza A H1N1\2009        | 27.1 (23.7-30.0, n=88)          | 30.3 (27.7-35.2, n=5)   | 0.160               |
| Influenza A H3               | 25.7 (20.5-29.6, n=164)         | 33.5 (29.5-29.6, n=5)   | <b>0.022</b>        |
| Influenza B                  | 24.5 (21.4-28.2, n=123)         | (20.7) <sup>c</sup>     | NA                  |
| Parainfluenza Virus 1        | 27.7 (24.1-31.6, n=57)          | 35.7 (34.0-36.4, n=3)   | <b>0.006</b>        |
| Parainfluenza Virus 2        | 30.0 (27.3-34.0, n=5)           | -                       | NA                  |
| Parainfluenza Virus 3        | 21.05 (18.2-27.5, n=112)        | 34.7 (32.1-35.5, n=5)   | <b>0.021</b>        |
| Parainfluenza Virus 4        | 27.1 (25.4-31.4, n=25)          | 30.0 (NA. n=2)          | 0.127               |
| Respiratory Syncytial Virus  | 23.0 (18.5-28.8, n=224)         | 34.2 (30.3-35.1, n=5)   | <b>0.021</b>        |
| <i>Bordetella pertussis</i>  | 26.2 (22.9-28.8, n= 36)         | 33.0 (30.9-34.2, n=6)   | <b>0.008</b>        |
| <i>Chlamydia pneumoniae</i>  | 30.9 (27.9-32.8, n=56)          | (35.6) <sup>c</sup>     | NA                  |
| <i>Mycoplasma pneumoniae</i> | 25.4 (23.6-28.4, n=44)          | 34.1(33.2-35.7, n=6)    | <b>0.009</b>        |

<sup>a</sup>True positive and False positive based on comparator assay (FA RPv1.7).

<sup>b</sup>Pvalues for differences between median values determined using Mood's Median Test. Significant values are in bold.

<sup>c</sup> Single value for FP

IQR, Interquartile range; NA, not applicable
